# Supplementary material for: Ultrasound Elastography to Assess Age of Deep Vein Thrombosis: A Systematic Review
Source: MDPI journal article supplement (doi:10.3390/diagnostics13122075), 2023-06-15
Supplement: s1 [file s1]

**Table S1: Search terms and search strategy**

| Pubmed                  |                                                  |
|-------------------------|--------------------------------------------------|
| Concept 1: elasticity   | (elast *) [All Fields]                           |
| Concept 2: thrombosis   | (thromb *) [All Fields] OR (clot *) [All Fields] |
| Combination of concepts | (Concept 1) AND (Concept 2)                      |
| Embase                  |                                                  |
| Concept 1: elasticity   | 'elast *':ab,ti                                  |
| Concept 2: thrombosis   | 'thromb*':ab,ti OR 'clot *':ab,ti                |
| Combination of concepts | (Concept 1) AND (Concept 2)                      |
| Web of Science          |                                                  |
| Concept 1: elasticity   | ALL = (elast *)                                  |
| Concept 2: thrombosis   | ALL = ((thromb *) OR (clot *))                   |
| Combination of concepts | (Concept 1) AND (Concept 2)                      |

*the asterisk "\*" is used as search method for truncation; the asterisk "\*" represents any group of characters, including no character.*

**Table S2.** Risk of bias and concerns regarding applicability across QUADAS-2 domains.

| Risk of Bias across QUADAS-2 domains                     |     |      |         |
|----------------------------------------------------------|-----|------|---------|
|                                                          | Low | High | Unclear |
| Flow and timing                                          | 9   | 0    | 0       |
| Reference standard                                       | 5   | 4    | 0       |
| Index test                                               | 2   | 7    | 0       |
| Patient Selection                                        | 5   | 3    | 1       |
| Concerns regarding Applicability across QUADAS-2 domains |     |      |         |
|                                                          | Low | High | Unclear |
| Reference standard                                       | 8   | 1    | 0       |
| Index test                                               | 6   | 3    | 0       |
| Patient Selection                                        | 6   | 2    | 1       |

## Formal evaluation of QUADAS-2

### Risk of Bias

Patient selection was found to be at high risk of bias in three studies. In two of them, the risk was related to a case-control-like study design [9,21]. In the third publication, the risk was associated to the possible misclassification of the index thrombotic event, due to the inclusion of patients with recurrent venous thromboembolism [22]. Finally, in one study, the patients' inclusion criteria were not specified [23].

The index test was found to be at high risk of bias in seven out of nine publications, because of prior knowledge of the patient's medical history by the sonographer [9,18,21,23,24,25,26]. Two studies, on the other hand, resulted in a low risk of bias in this domain, thanks to the use of blinding in the evaluation of the elastosonographic outcome [19,22].

Four studies were found to be at risk of bias in the domain concerning the reference standard, due to the classification of thrombosis in acute, sub-acute and chronic with different time cut-offs compared to those foreseen by the definitions of the current review [22,23,25,26].

The domain of the flow and timing of execution of the index test compared to the reference standard resulted in a low risk of bias in all the studies evaluated, since the anamnestic collection necessarily precedes the execution of an instrumental investigation in this clinical context.

### Concerns regarding Applicability

The patient selection domain was found to be at high risk of bias in two studies, owing to the inclusion of patients with superficial vein thrombosis [9,23]. In one case [26] the external validity of the patient selection has been defined as unclear, due to the absence of specific definition of the type of venous thrombosis evaluated.

The index test presented a risk related to applicability in three studies which tested SE through evaluation of the colorimetric map [9,22,23]. Studies that have instead evaluated SWE or that have integrated SE with the calculation of the strain ratio present a low risk of applicability concerns related to their higher reproducibility [18,19,21,24,25,26].

In only one case, a high-risk regarding applicability concerns in the domain of the reference standard was detected. In the study by Paluch et al., in fact, the definition of acute and sub-acute thrombosis was related to the temporal distance from the execution of a sclerotherapy treatment, with subsequent non-applicability in different clinical contexts [23].
